# Supplementary material for: In vivoandin silicoinvestigations of the pegylated gold nanoparticle treatment of amyotrophic lateral sclerosis in mice
Source: Royal Society of Chemistry journal article supplement (doi:10.1039/d2nj00452f), 2022-01-01
Supplement: d2nj00452f1.pdf [file d2nj00452f1.pdf]

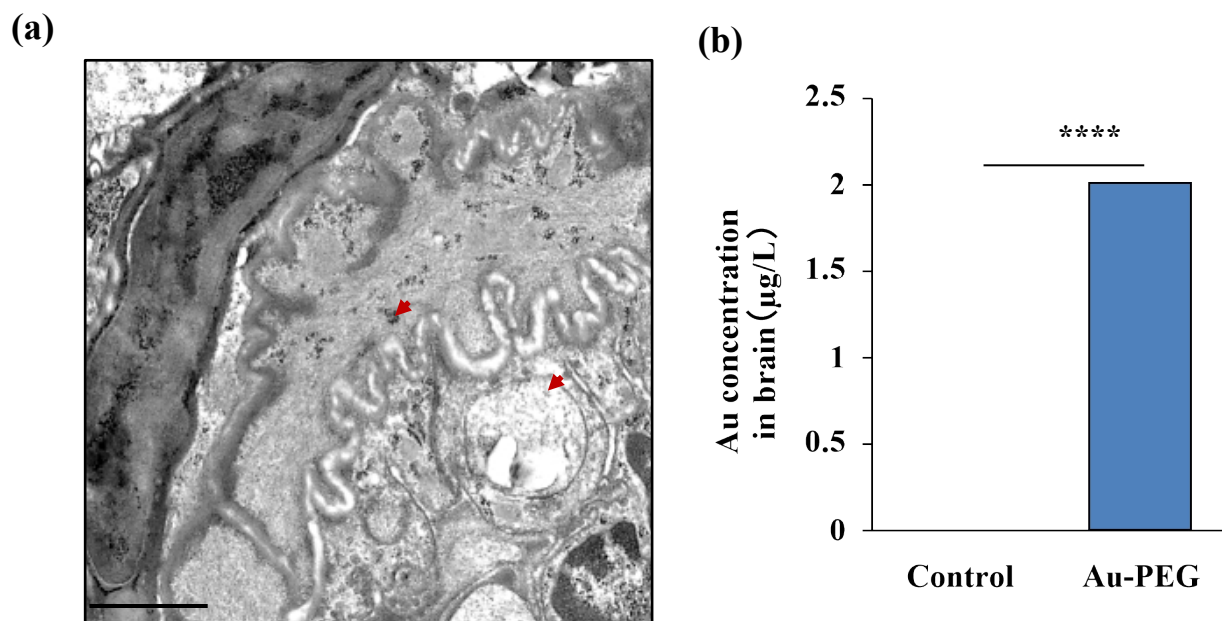

**Figure S3:** **(a)** Showing intracellular distribution of Au-PEG. Electron micrographs (TEM) of mice brain section, arrows indicate gold nanoparticle distribution throughout the cellular compartments (Scale bar  $1\ \mu\text{m}$ ). **(b)** The concentration of gold uptake in the whole brain homogenate of control and Au-PEG treated mice was measured using inductively coupled plasma mass spectrometry (ICP-MS). Error bars represent  $\text{mean} \pm \text{SEM}$ . Statistical analysis was performed using a student's t-test, with \*\*\*\* indicating  $p < 0.0001$ .

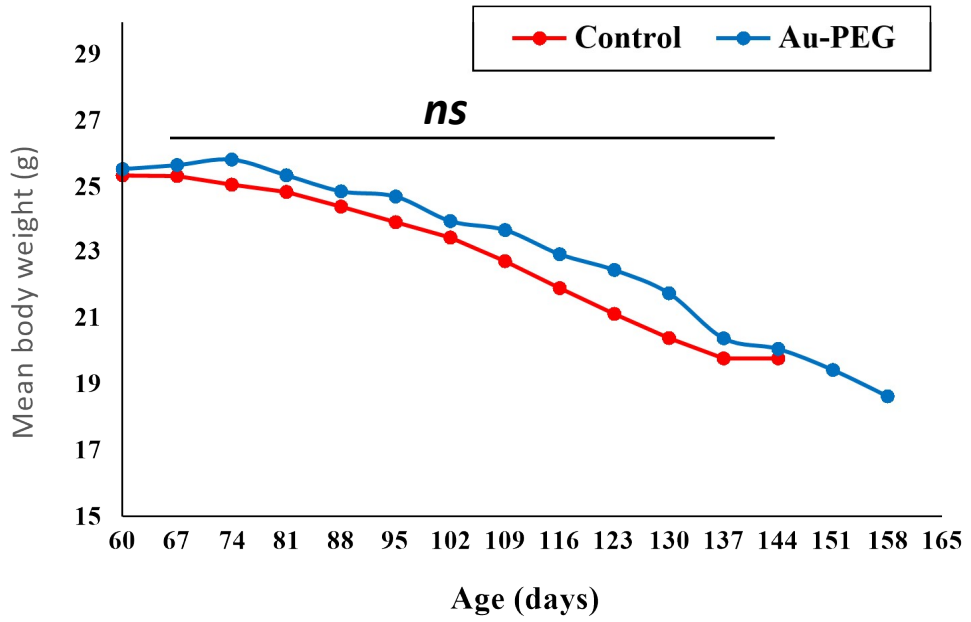

**Figure S6 : (a)**
