# Supplementary material for: In vivoandin silicoinvestigations of the pegylated gold nanoparticle treatment of amyotrophic lateral sclerosis in mice
Source: Royal Society of Chemistry journal article supplement (doi:10.1039/d2nj00452f), 2022-01-01
Supplement: d2nj00452f2.pdf [file d2nj00452f2.pdf]

***In-vivo and In-silico investigation of therapeutic effect of Au-PEG  
nanoconjugates in Amyotrophic lateral sclerosis (SOD1<sup>G93A</sup>)***

*Sunil Kumar Vimal<sup>1\*</sup>, Cao Hongyi<sup>1\*</sup>, Amit Dubey,<sup>2,3</sup> Lokesh Agrarwal,<sup>4</sup> Nishit Pathak<sup>1</sup>, Zuo  
Hua,<sup>1</sup> Deepak Kumar,<sup>5</sup> <sup>1</sup>Sanjib, Bhattacharyya<sup>1#</sup>*

<sup>1</sup>Department of Pharmaceutical Sciences, Southwest University, Chongqing 400715, P.R. China.

<sup>2</sup>Computational Chemistry and Drug Discovery Division, Quanta Calculus Pvt. Ltd Kushinagar  
274203, India

<sup>3</sup>Department of Pharmacology, Saveetha Dental College and Hospital, Saveetha Institute of  
Medical and Technical Sciences, Chennai, Tamil Nadu, India.

<sup>4</sup> Molecular Neurobiology group, Okinawa Institute of science and technologies, Japan

<sup>5</sup>Department of Pharmaceutical Chemistry, School of Pharmaceutical Sciences, Shoolini  
University, Solan, 173229 India

*\*Equal contribution*

*# Corresponding Author*

Sanjib Bhattacharyya (sanjib2017@swu.edu.cn)

Department of Pharmaceutical Sciences and Chinese Traditional Medicine, Southwest University,  
Beibei, Chongqing, 400715, China

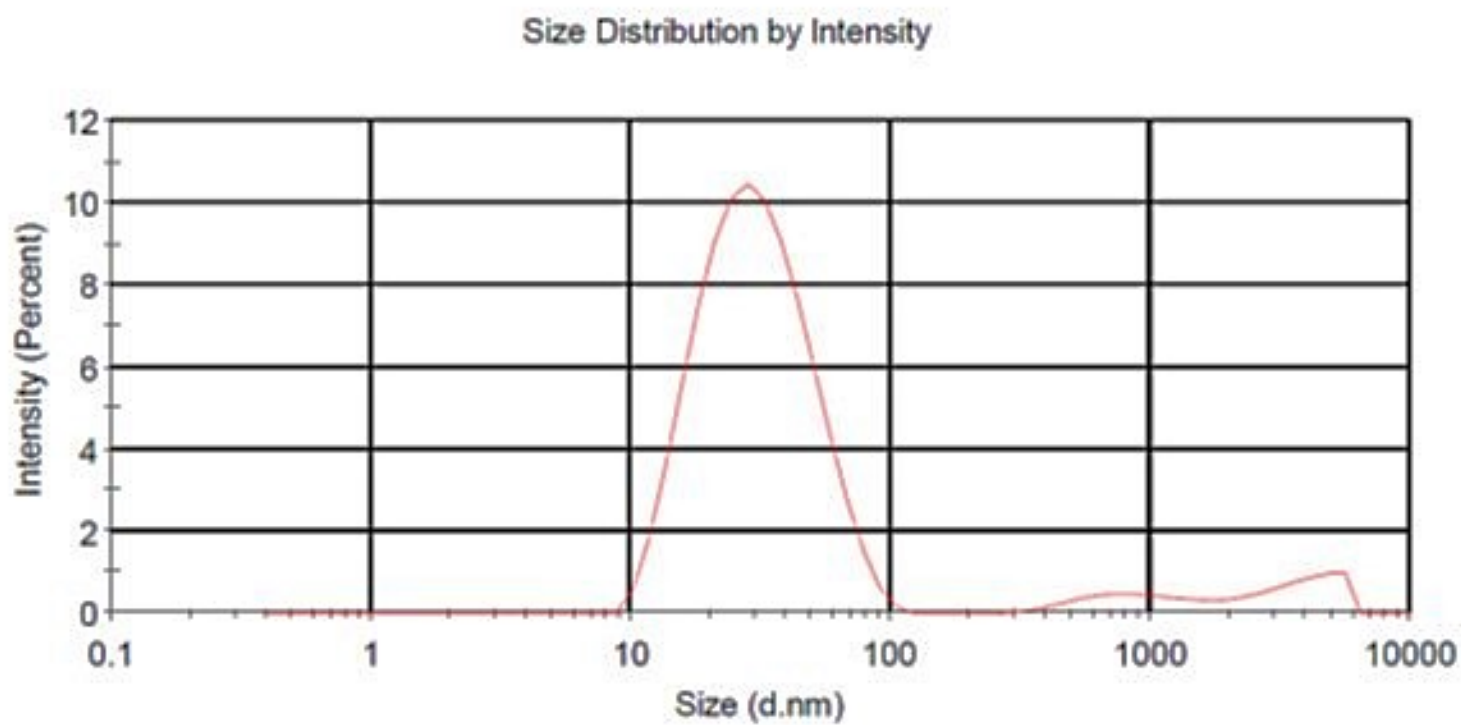

**Figure S1:** Characterization of size distribution of Au-PEG conjugate using dynamic light scattering (DLS) measurements exhibit the average Au-PEG size 30 nm .

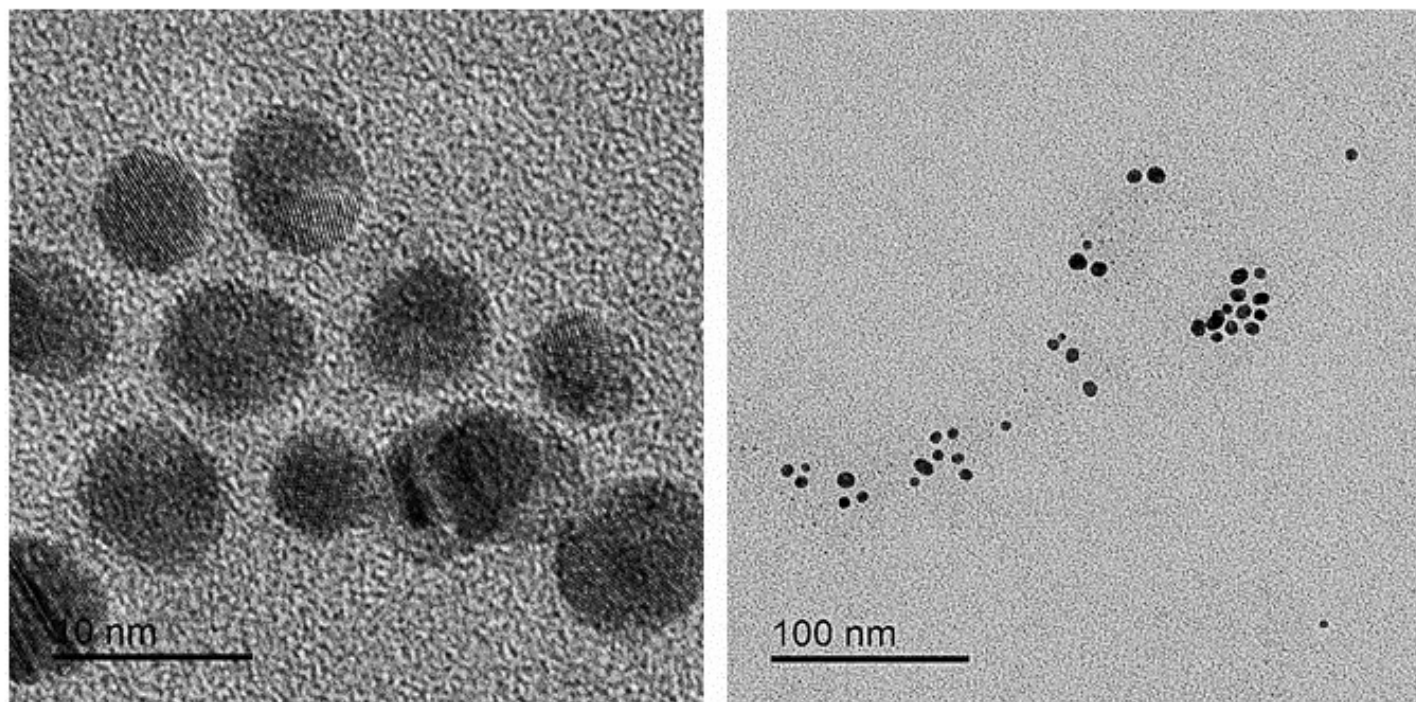

**Figure S2:** Characterization gold nanoparticles of Au-PEG conjugates using TEM

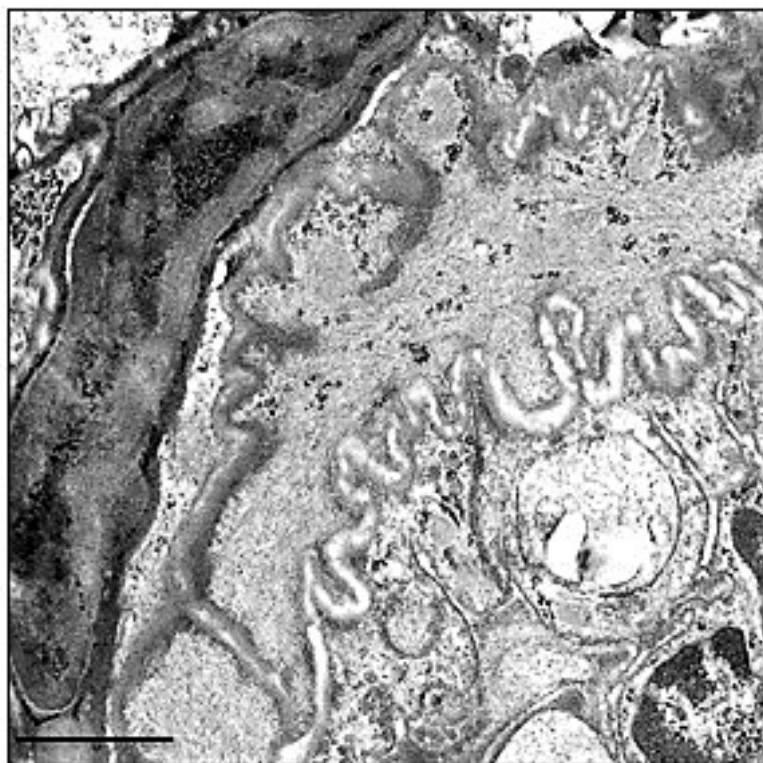

**Figure S3:** Showing intracellular distribution of Au-PEG. Electron micrographs (TEM) of mice brain section, arrows indicate gold nanoparticle distribution throughout the cellular compartments (Scale bar 1  $\mu\text{m}$ ).

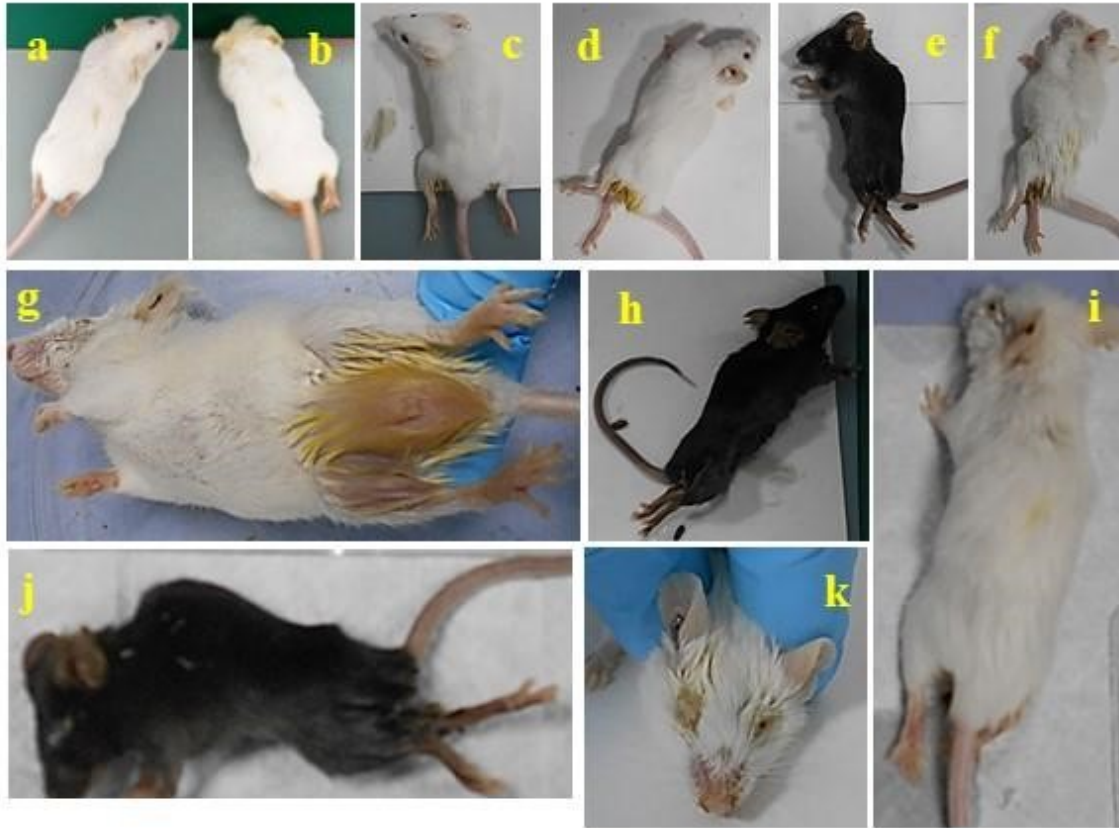

**Figure S4:** Pictures are showing key phenotypic symptoms of disease progression in the SOD1-G93A mouse model of ALS. Representative pictures for control mice from a-f) showing body symmetry and hindlimbs abnormality; completely collapsed to rigid paralysis over time. g) loss of control in urination. h-i) less extending in hind limbs. J-k) teary eyes with affected response to object.

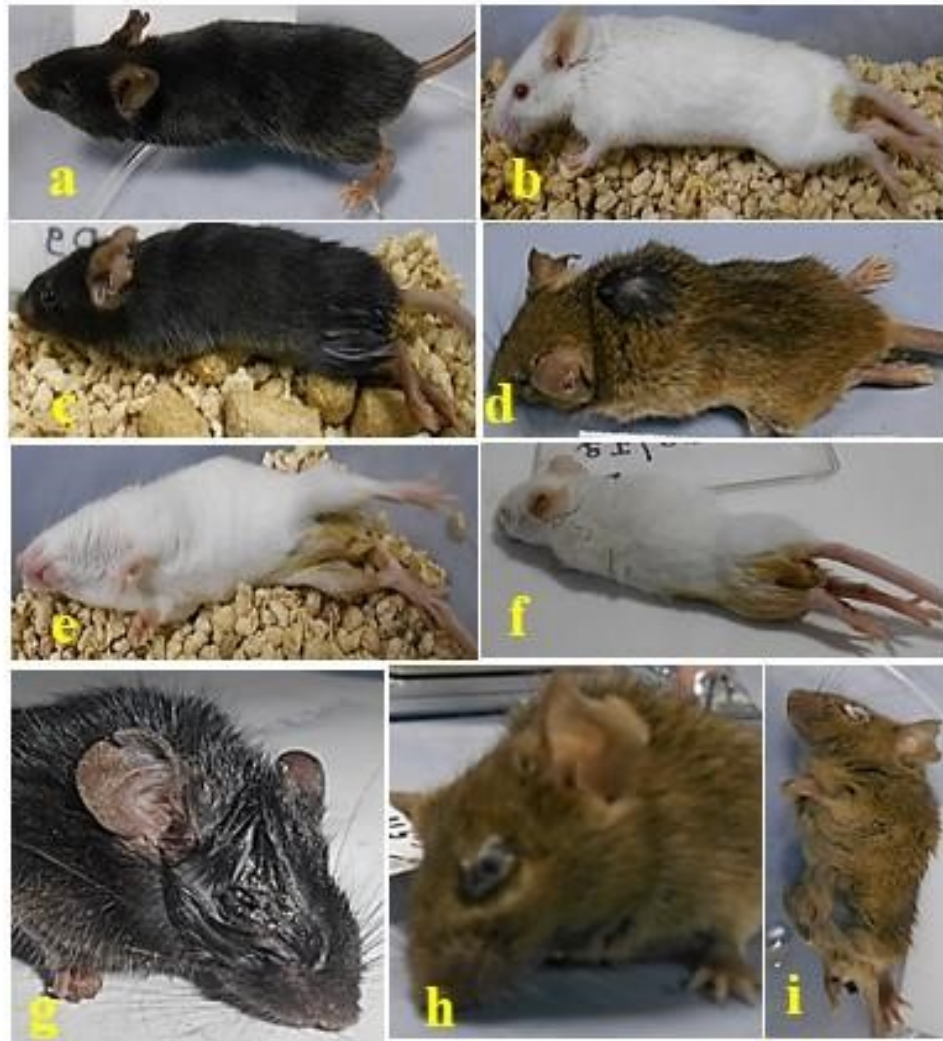

**Figure S5:** Pictures are showing key phenotypic symptoms of disease progression in the SOD1<sup>G93A</sup> transgenic mouse model of ALS. Representative pictures of Au-PEG treated mice, from a-d) showing body symmetry and hindlimbs abnormality; completely collapsed to rigid paralysis over time. e) loss of control in urination. f) less extending in hind limbs. g-i) teary eyes with affected response to object.

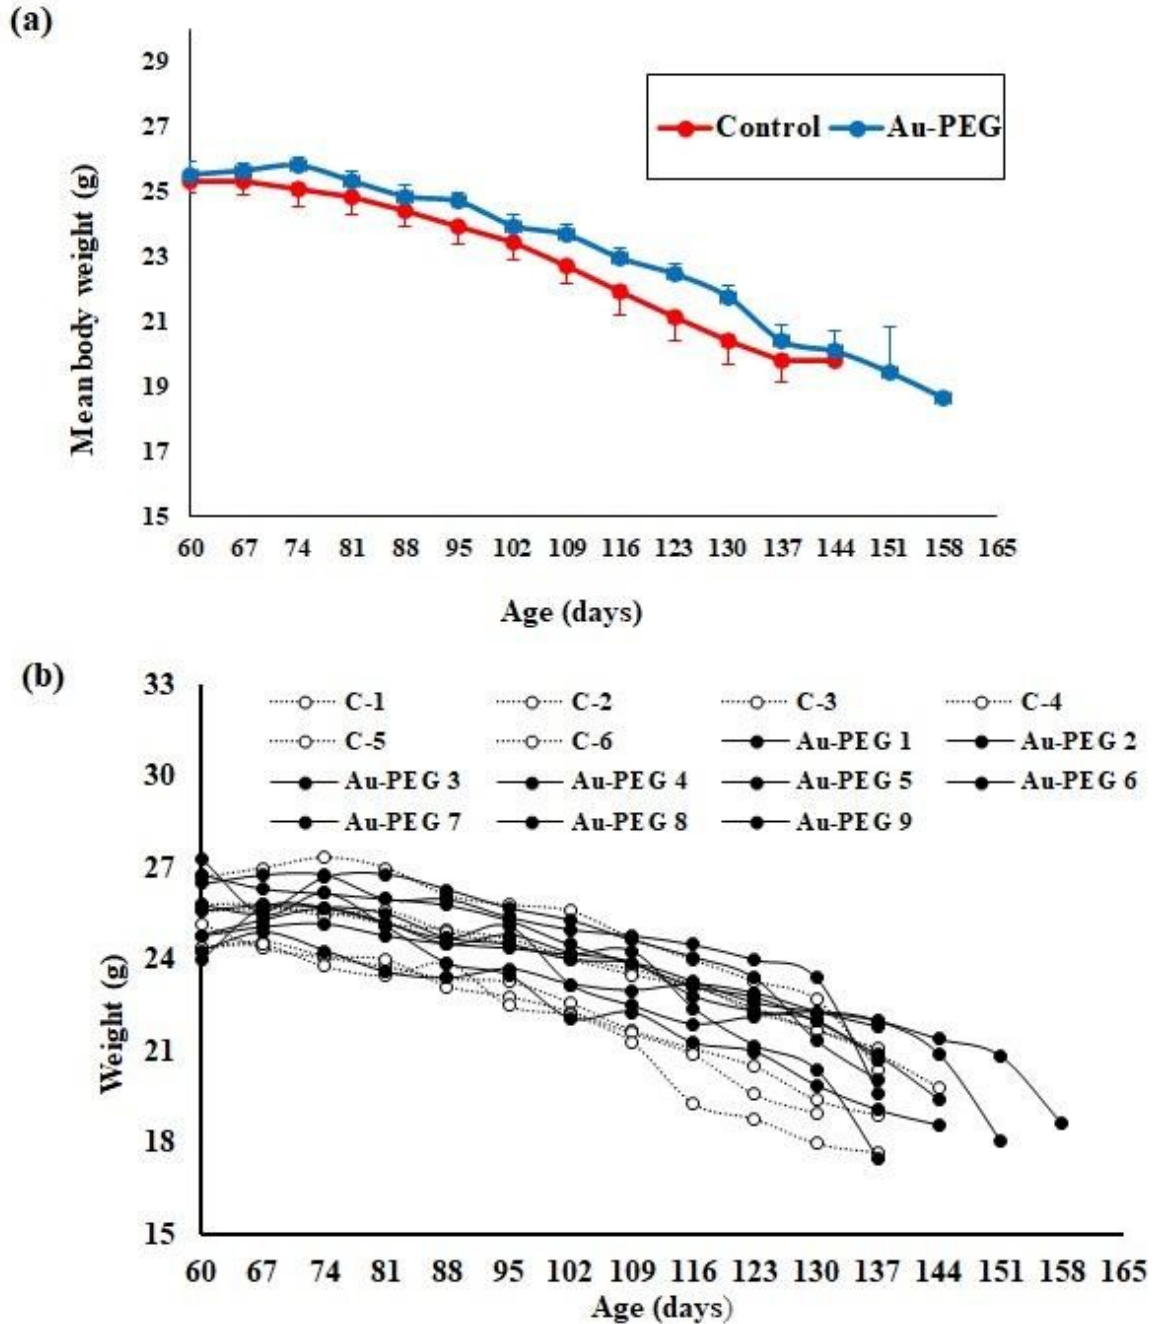

**Figure S6:** Body weight curves. **(a)** Changes over time in mean body weight of control and Au-PEG treated SOD1<sup>G93A</sup> transgenic mice (control n=6, treatment n=9). Data are shown as mean  $\pm$  SEM. No significant differences were noticed between control and treatment group mice. **(b)** Body weight pattern of individual animals showing during disease progression.

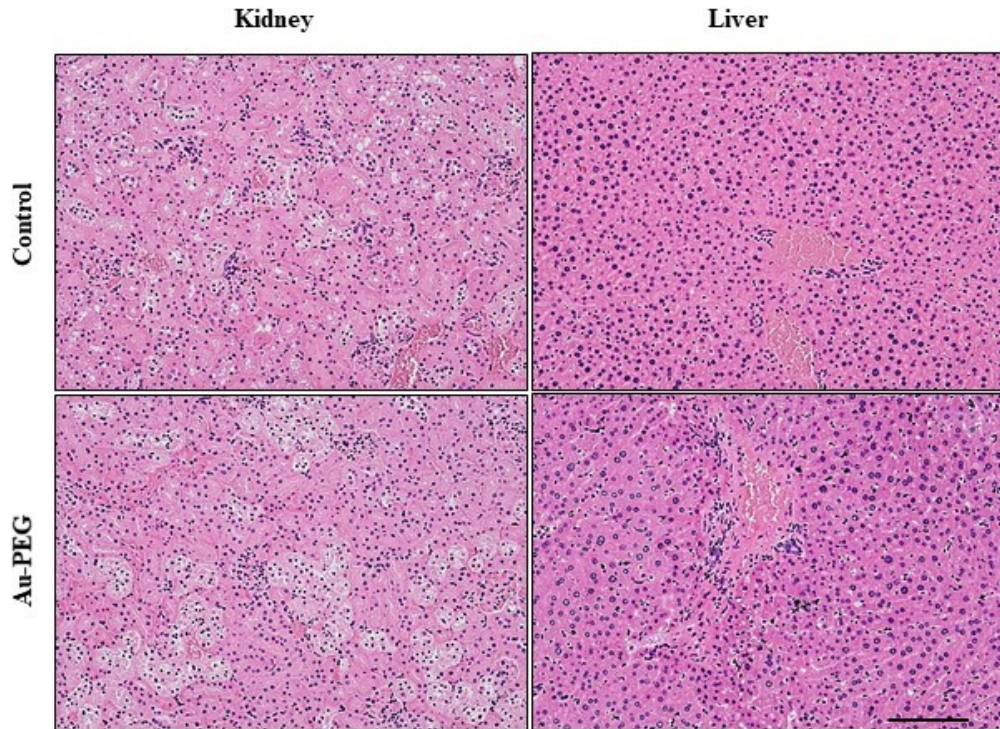

**Figure S7:** Histological examination of kidney and liver of amyotrophic lateral sclerosis (ALS) in SOD1-G93A mice to assess possible toxic effects of Au-PEG treatment by using hematoxylin/eosin stain. Images were taken at 200X magnification (Scale bar=200 $\mu$ m).

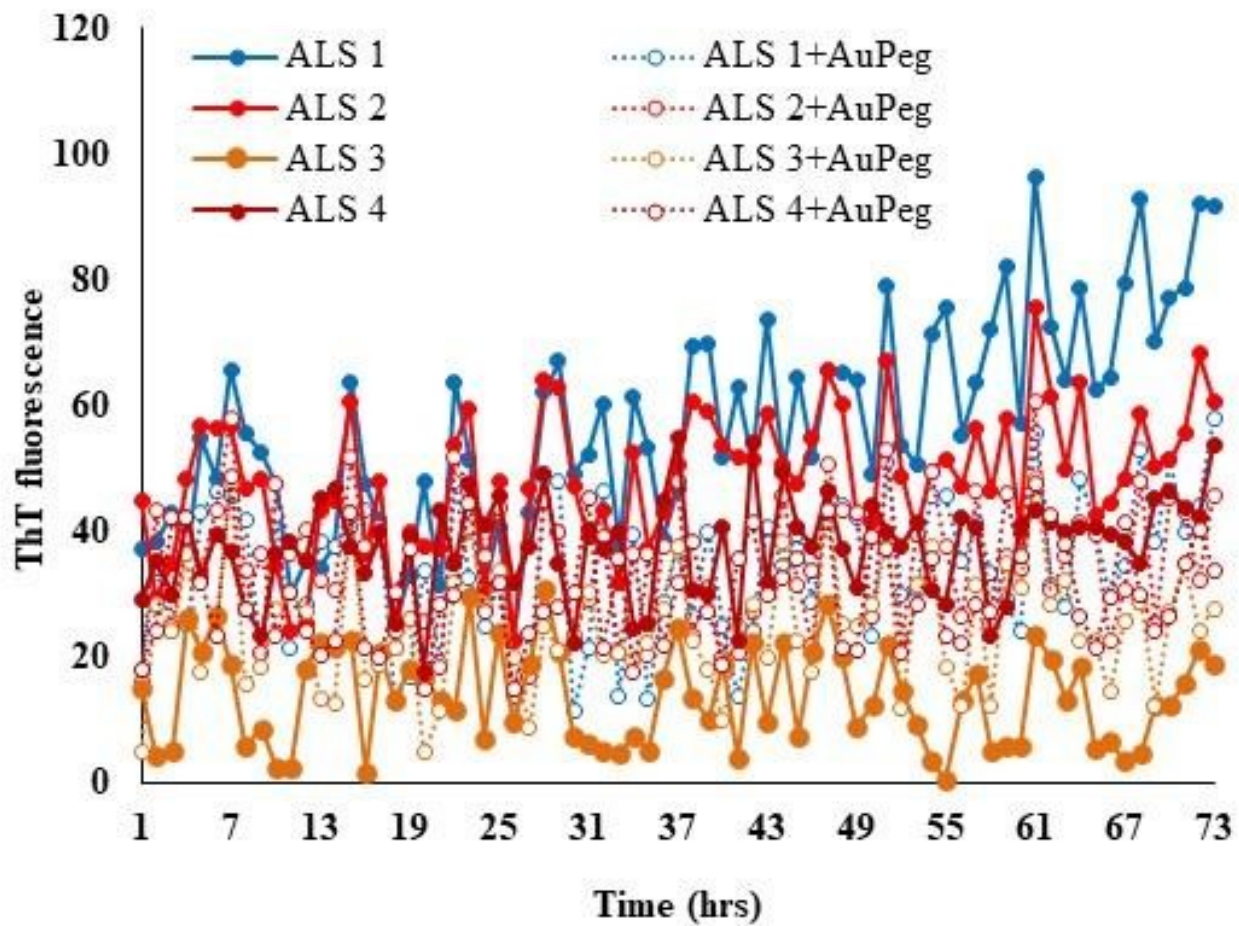

**Figure S8:** ThT assay showing therapeutic efficacy of Au-PEG against human serum of ALS patient. Serum of ALS Human patient (n=4) incubated with/without Au-PEG using solution of thioflavin T dye (20  $\mu$ mole) and fluorescence intensity was measured.

**Table S1:** Human serum of Amyotrophic lateral sclerosis patient

| S. No | Human | Proteins (PDB Code) | 1UXM Residues    | 6BBN residues    | Distance           | Interaction type          |                                                                                                  |
|-------|-------|---------------------|------------------|------------------|--------------------|---------------------------|--------------------------------------------------------------------------------------------------|
|       | Coc   | A4V Human           | Ser142 (Chain E) | Asn36 (Chain P)  | 2.6 Å <sup>0</sup> | Hydrogen Bond,            | Race                                                                                             |
| 1     | BR    | SOD1 (1UXM) +       |                  |                  |                    | Van der Waals clashes     | Caucasian                                                                                        |
| 2     | BR    | Tubulin (6BBN)      | Gly130           | Arg304           | 2.6 Å <sup>0</sup> | Van der Waals clashes (5) | Caucasian                                                                                        |
| 3     | BR    |                     | Gly130           | Leu304           | 2.6 Å <sup>0</sup> | Van der Waals clashes (5) | Caucasian                                                                                        |
| 4     | BR    |                     |                  |                  |                    |                           | Caucasian                                                                                        |
|       |       | G93A Human          | 3GZO Residues    |                  |                    |                           | <b>Table S2:</b><br>Interaction analysis of protein-protein complexes from computational docking |
|       |       | SOD1 (3GZO) +       | Ala93 (Chain C)  | Lys338 (Chain C) | 2.6 Å <sup>0</sup> | Hydrogen Bond             |                                                                                                  |
|       |       | Tubulin (6BBN)      | Asp92            | Thr337           | 2.4 Å <sup>0</sup> | Hydrogen Bond             |                                                                                                  |
|       |       |                     |                  |                  |                    |                           |                                                                                                  |
|       |       |                     |                  |                  |                    |                           |                                                                                                  |
|       |       |                     | Lys23 (Chain A)  | Glu100           | 3.2 Å <sup>0</sup> | Salt bridge               |                                                                                                  |
|       |       |                     | Gln153           | Leu42            | 3.3 Å <sup>0</sup> | Van der Waals clashes     |                                                                                                  |
|       |       |                     |                  |                  |                    |                           |                                                                                                  |
|       |       |                     | Pro13            | Arg215           | 2.8 Å <sup>0</sup> | Van der Waals clashes (5) |                                                                                                  |
|       |       |                     | Lys36            | Lys299           | 3.1 Å <sup>0</sup> | Van der Waals clashes (5) |                                                                                                  |
|       |       |                     | Ala55 (Chain H)  | Arg308 (Chain B) | 2.4 Å <sup>0</sup> | Van der Waals clashes     |                                                                                                  |
|       |       |                     | Thr54            | His309           | 2.1 Å <sup>0</sup> | Van der Waals clashes (5) |                                                                                                  |
|       |       |                     | Thr54            | Tyr342           | 2.7 Å <sup>0</sup> | Van der Waals clashes (2) |                                                                                                  |
|       |       |                     |                  |                  |                    |                           |                                                                                                  |
|       |       |                     | Leu42 (Chain C)  | Ala55 (Chain G)  | 3.3 Å <sup>0</sup> | Van der Waals clashes     |                                                                                                  |
|       |       |                     | Lys75            | Asp52            | 2.9 Å <sup>0</sup> | Salt bridge               |                                                                                                  |
|       |       |                     | Asp76            | Gln153           | 3.2 Å <sup>0</sup> | Van der Waals clashes     |                                                                                                  |
|       |       |                     |                  |                  |                    |                           |                                                                                                  |
|       |       |                     | Lys91            | Val440           | 2.6 Å <sup>0</sup> | Van der Waals clashes (2) |                                                                                                  |
|       |       |                     | Lys122           | Glu40            | 3.7 Å <sup>0</sup> | Salt bridge               |                                                                                                  |
|       |       |                     | Asp76            | Lys75            | 3.0 Å <sup>0</sup> | Salt bridge               |                                                                                                  |

| Complex                                               | Hydrophobic                                                                                                                                          | Polar                                                                                                                                                                                               | Negative                                                                                                                                              | Positive                                                                                                                                                                                                                                                                          | Glycine                                              | Metal                                                                                    |
|-------------------------------------------------------|------------------------------------------------------------------------------------------------------------------------------------------------------|-----------------------------------------------------------------------------------------------------------------------------------------------------------------------------------------------------|-------------------------------------------------------------------------------------------------------------------------------------------------------|-----------------------------------------------------------------------------------------------------------------------------------------------------------------------------------------------------------------------------------------------------------------------------------|------------------------------------------------------|------------------------------------------------------------------------------------------|
| <b>A4V Human SOD1 (1UXM) + Tubulin (6BBN) + Gold</b>  | 1UXM (Chain E): Ile518<br><br>1UXM (Chain L): Pro62, Pro66, Leu67<br><br>6BBN (Chain E): Pro500<br><br>6BBN (Chain P): Trp112, Phe145                | 1UXM (Chain L): His63, Asn65, Ser68, His71, His80, Thr135<br><br>6BBN (Chain D): Ser423, Asn426, Ser430<br><br>6BBN (Chain E): Gln392, Asn498, His501, Thr502, Asn521<br><br>6BBN (Chain P): Thr111 | 1UXM (Chain L): Glu49, Glu77, Glu78, Asp109, Glu132<br><br>6BBN (Chain D): Asp427<br><br>6BBN (Chain E): Glu388, Glu520<br><br>6BBN (Chain P): Asp143 | 1UXM (Chain L): Arg69 (Two Salt Bridge), Lys70 (Three Salt Bridges), Lys136<br><br>6BBN (Chain D): Arg400 (Three Salt Bridges)<br><br>6BBN (Chain E): Lys391 (Two Salt Bridge), Arg514 (salt Bridge)<br><br>6BBN (Chain P): Lys144 (Four Salt Bridges), Lys147 (Two Salt Bridges) | 6BBN (Chain E): Gly519<br><br>6BBN (Chain P): Gly146 | 1UXM (Chain H): Mol H: 0 (Five Metal Coordination)                                       |
| <b>G93A Human SOD1 (3GZO) + Tubulin (6BBN) + Gold</b> | 6BBN (Chain B): Phe399, Met416<br><br>6BBN (Chain C): Val437, Val440<br><br>6BBN (Chain E): Tyr268<br><br>3GZO (Chain H): Pro13, Leu38, Leu42, Ala89 | 3GZO (Chain D): Thr39<br><br>3GZO (Chain E): Thr88, Ser142<br><br>6BBN (Chain B): Thr419, Ser423, Asn426<br><br>6BBN (Chain C): Ser439<br><br>6BBN (Chain E): Gln177, Gln178, Thr266                | 3GZO (Chain H): Glu40, Asp90, Asp92, Glu121<br><br>6BBN (Chain B): Glu415, Glu422<br><br>6BBN (Chain C): Asp345, Asp438<br><br>6BBN (Chain E): Asp264 | 6BBN (Chain B): Arg400 (Two Salt Bridges), Arg401 (Salt Bridge), Lys402 (Three Salt Bridges), Arg173, Lys262 (Three Salt Bridges)<br><br>3GZO (Chain H): Lys91 (Salt Bridge), Lys122 (Two Salt Bridges)                                                                           | 3GZO (Chain H): Gly37, Gly41                         | 3GZO (Chain H): Mol0 (Ten Metal Coordination)<br><br>Mol H: 0 (Three Metal Coordination) |

**Table S3:** Docking Results showing amino acid residues participated in the interactions with the A4V Human SOD1 complexed with Tubulin with AuNPs and G93A Human SOD1 complexed with Tubulin with AuNPs

### **A4V Human SOD1- Tubulin with AuNP interaction**

To analyze the binding position occupied by the AuNPs in the selected A4V Human SOD1- Tubulin protein docked complexes, initially AuNPs were aligned to the Tubulin Chain D, E and P) (**Figure 3a**). Remarkably, AuNPs showed occupancy in between the binding cavity of A4V Human SOD1- Tubulin with  $<10$  Å RMSD. Furthermore, AuNPs with A4V Human SOD1- Tubulin protein was analyzed for docking energy and molecular contact formation around the ligand at 4 Å distance, including,  $\pi$ - $\pi$ / $\pi$ -cation, hydrophobic, polar, negative, positive, and glycine interactions, (**Figure 3b**). A4V Human SOD1- Tubulin with AuNP complex revealed -17.5 kcal/mol docking score via formation of two and three Salt Bridges bonds at A4V SOD1 (Chain L) Positive Residues Arg69

residue and Lys70 residue respectively. Five metal coordination bonds make the AuNPs more stable inside the A4V SOD1 and Tubulin complex. However, Positive residues of Tubulin (Chain D, E and P) involve an overall maximum number of Salt Bridges formations at Lys144, Lys147, Lys391, Arg400, Lys499, Arg514 (**Table S3**).

### **G93A SOD1- Tubulin-AuNPs Interaction**

AuNPs occupied the selected binding region between G93A Human SOD1- Tubulin protein docked complexes. Here, AuNPs were aligned to the Tubulin Chain B, C and E) (**Figure 4a**). However, AuNPs also showed occupancy in between the binding cavity of G93A Human SOD1- Tubulin with <10 Å RMSD. Additionally, AuNPs with G93A Human SOD1- Tubulin protein was investigated for its docking energy and molecular contact formation around the AuNPs at 4 Å distance, including,  $\pi$ - $\pi$ / $\pi$ -cation, hydrophobic, polar, negative, positive, and glycine interactions, (**Figure 4b**). G93A Human SOD1- Tubulin with AuNPs complex interpreted with maximum -17.8 kcal/mol docking score and patchdock score 13404 (Table 2 and Table 3) by substantial contribution of one and two Salt Bridges bonds at G93A SOD1 (Chain H) Positive Residues Lys91 and Lys122 respectively. Exceptionally, with maximum metallic bond (Thirteen metal coordination bonds) make the AuNPs more stable in between the G93A SOD1 and Tubulin complex. However, Positive group of amino acids of Tubulin Chain B, residues Arg400, Arg401 and Lys402 involved with Salt bridges formations and Chain E, residues Arg173 and Lys262 makes maximum number of Salt Bridges formations (**Table S3**).

### **Superposition of A4V Human SOD1- Tubulin over A4V Human SOD1- Tubulin protein complex with AuNPs**

The docked complex A4V Human SOD1- Tubulin over docked complex of A4V Human SOD1- Tubulin protein complex with AuNPs were superposed to investigate the sequence and structure similarity in the interaction region. The complexes interacting sites align well, with a C-alpha atoms RMSD of 49.0095 with Maximum Diff = 119.0261 between atoms 3910 & 4152

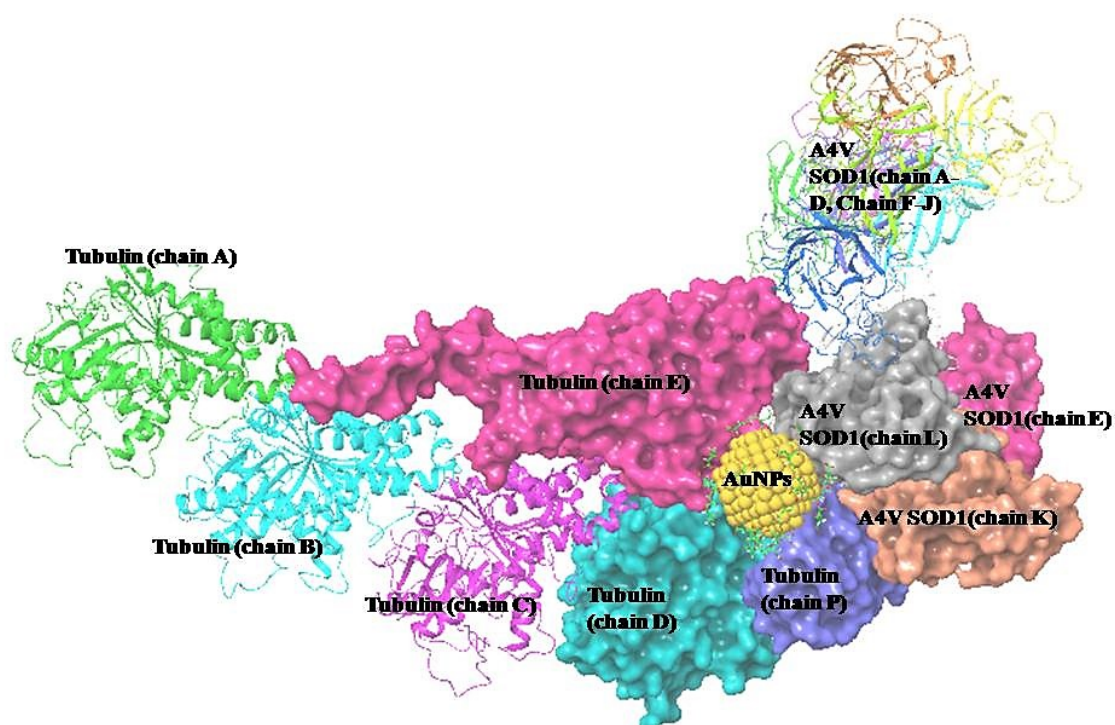

**Figure S9:** Superimposed overlay of docked complex of A4V Human SOD1- Tubulin protein complex (All Chains) (Ribbon Cartoon Structures) over A4V Human SOD1- Tubulin protein complex with AuNPs (Surface map Structures) models.

### **Superimposition of G93A Human SOD1- Tubulin over G93A Human SOD1- Tubulin protein complex with AuNPs**

The docked complex G93A Human SOD1- Tubulin over the docked complex of G93A Human SOD1- Tubulin protein complex with AuNPs were also superposed to determine the sequence and

structure similarity in the interaction site region. The complexes interacting sites align well, with a C-alpha atoms RMSD of 63.6274 with Maximum Diff = 146.5903 between atoms 950 & 983

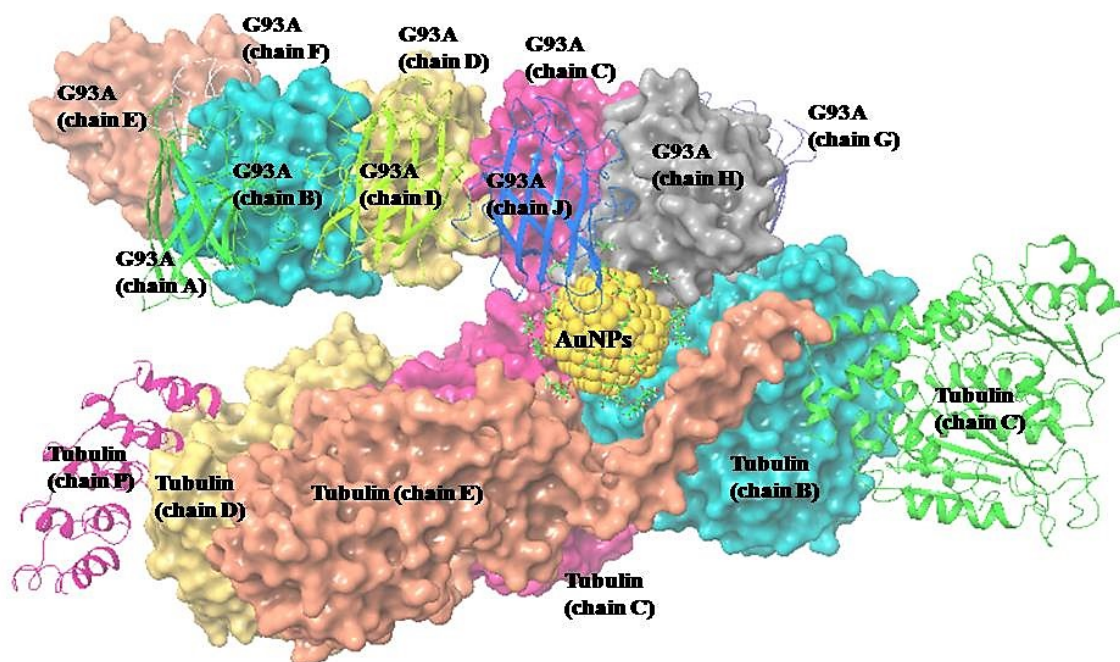

**Figure S10: Superimposed overlay of docked complex of G93A Human SOD1- Tubulin protein complex (Ribbon Cartoon Structures) over A4V Human SOD1- Tubulin protein complex with AuNP (Surface map Structures) models.**
